# Supplementary material
Source: PubMed Central journal article supplement (PMC3572459)
Supplement: npp2012226x1.pdf [file npp2012226x1.pdf]

| Cohort and subjects | Cocaine exposure CPP day 1 (mg/kg) | Cocaine exposure CPP day 2 (mg/kg) | Cocaine exposure CPP day 3 (mg/kg) | Daily cocaine exposure during locomotor sensitization (mg/kg) |
|---------------------|------------------------------------|------------------------------------|------------------------------------|---------------------------------------------------------------|
| <b>WT saline</b>    |                                    |                                    |                                    |                                                               |
| 465                 | 0                                  | 0                                  | 0                                  | 0                                                             |
| 421                 | 0                                  | 0                                  | 0                                  | 0                                                             |
| 385                 | 0                                  | 0                                  | 0                                  | 0                                                             |
| 456                 | 0                                  | 0                                  | 0                                  | 0                                                             |
| 457                 | 0                                  | 0                                  | 0                                  | 0                                                             |
| 438                 | 0                                  | 0                                  | 0                                  | 0                                                             |
| 201                 | 0                                  | 0                                  | 0                                  | 0                                                             |
| 302                 | 0                                  | 0                                  | 0                                  | 0                                                             |
| 247                 | 0                                  | 0                                  | 0                                  | 0                                                             |
| 240                 | 0                                  | 0                                  | 0                                  | 0                                                             |
| 251                 | 0                                  | 0                                  | 0                                  | 0                                                             |
| 254                 | 0                                  | 0                                  | 0                                  | 0                                                             |
| 423                 | 0                                  | 0                                  | 0                                  | 0                                                             |
| 346                 | 0                                  | 0                                  | 0                                  | 0                                                             |
| 212                 | 0                                  | 0                                  | 0                                  | 0                                                             |
| 216                 | 0                                  | 0                                  | 0                                  | 0                                                             |
| 250                 | 0                                  | 0                                  | 0                                  | 0                                                             |
| 392                 | 0                                  | 0                                  | 0                                  | 0                                                             |
| 296                 | 0                                  | 0                                  | 0                                  | 0                                                             |
| <b>WT cocaine</b>   |                                    |                                    |                                    |                                                               |
| 448                 | 5                                  | 5                                  | 5                                  | 15                                                            |
| 356                 | 5                                  | 5                                  | 5                                  | 15                                                            |
| 458                 | 5                                  | 5                                  | 5                                  | 15                                                            |
| 492                 | 5                                  | 5                                  | 5                                  | 15                                                            |
| 497                 | 5                                  | 5                                  | 5                                  | 15                                                            |
| 478                 | 5                                  | 5                                  | 5                                  | 15                                                            |
| 223                 | 5                                  | 5                                  | 5                                  | 15                                                            |
| 263                 | 5                                  | 5                                  | 5                                  | 15                                                            |
| 264                 | 5                                  | 5                                  | 5                                  | 15                                                            |
| 425                 | 5                                  | 5                                  | 5                                  | 15                                                            |
| 256                 | 5                                  | 5                                  | 5                                  | 15                                                            |
| 307                 | 5                                  | 5                                  | 5                                  | 15                                                            |
| 159                 | 5                                  | 5                                  | 5                                  | 15                                                            |
| 315                 | 5                                  | 5                                  | 5                                  | 15                                                            |
| 314                 | 5                                  | 5                                  | 5                                  | 15                                                            |
| 235                 | 5                                  | 5                                  | 5                                  | 15                                                            |
| 270                 | 5                                  | 5                                  | 5                                  | 15                                                            |
| 220                 | 5                                  | 5                                  | 5                                  | 15                                                            |
| <b>KO saline</b>    |                                    |                                    |                                    |                                                               |
| 396                 | 0                                  | 0                                  | 0                                  | 0                                                             |
| 470                 | 0                                  | 0                                  | 0                                  | 0                                                             |
| 410                 | 0                                  | 0                                  | 0                                  | 0                                                             |
| 484                 | 0                                  | 0                                  | 0                                  | 0                                                             |
| 389                 | 0                                  | 0                                  | 0                                  | 0                                                             |
| 474                 | 0                                  | 0                                  | 0                                  | 0                                                             |
| 150                 | 0                                  | 0                                  | 0                                  | 0                                                             |
| 154                 | 0                                  | 0                                  | 0                                  | 0                                                             |
| 196                 | 0                                  | 0                                  | 0                                  | 0                                                             |
| 269                 | 0                                  | 0                                  | 0                                  | 0                                                             |
| 276                 | 0                                  | 0                                  | 0                                  | 0                                                             |
| 183                 | 0                                  | 0                                  | 0                                  | 0                                                             |
| 353                 | 0                                  | 0                                  | 0                                  | 0                                                             |
| 424                 | 0                                  | 0                                  | 0                                  | 0                                                             |
| 336                 | 0                                  | 0                                  | 0                                  | 0                                                             |
| 292                 | 0                                  | 0                                  | 0                                  | 0                                                             |
| <b>KO cocaine</b>   |                                    |                                    |                                    |                                                               |
| 529                 | 5                                  | 5                                  | 5                                  | 15                                                            |
| 408                 | 5                                  | 5                                  | 5                                  | 15                                                            |
| 411                 | 5                                  | 5                                  | 5                                  | 15                                                            |
| 416                 | 5                                  | 5                                  | 5                                  | 15                                                            |
| 489                 | 5                                  | 5                                  | 5                                  | 15                                                            |
| 355                 | 5                                  | 5                                  | 5                                  | 15                                                            |
| 496                 | 5                                  | 5                                  | 5                                  | 15                                                            |
| 345                 | 5                                  | 5                                  | 5                                  | 15                                                            |
| 416                 | 5                                  | 5                                  | 5                                  | 15                                                            |
| 155                 | 5                                  | 5                                  | 5                                  | 15                                                            |
| 145                 | 5                                  | 5                                  | 5                                  | 15                                                            |
| 265                 | 5                                  | 5                                  | 5                                  | 15                                                            |
| 356                 | 5                                  | 5                                  | 5                                  | 15                                                            |
| 236                 | 5                                  | 5                                  | 5                                  | 15                                                            |
| 326                 | 5                                  | 5                                  | 5                                  | 15                                                            |
| 283                 | 5                                  | 5                                  | 5                                  | 15                                                            |

**Supplementary Table S1.** Chart showing the prior injection/drug exposure for each group in the sensitization study. Mice that had been tested for conditioned place preference (CPP) were later subjected to the locomotor sensitization paradigm and received either saline or cocaine injections, as they had in the place preference paradigm. The first column provides the animal tag number.
